# Supplementary material for: Life expectancy and geographic variation in mortality: an observational comparison study of six high-income Anglophone countries
Source: HighWire-hosted journal article supplement (doi:10.1136/bmjopen-2023-079365), 2024-07-01
Supplement: bmjopen-2023-079365supp001_data_supplement.pdf [file bmjopen-2023-079365supp001_data_supplement.pdf]

Supplementary Figures and Tables

| Contents                                                                                                                                                                                      | Page      |
|-----------------------------------------------------------------------------------------------------------------------------------------------------------------------------------------------|-----------|
| <b>Supplementary table 1.</b> Cause of death categories and ICD-10 codes                                                                                                                      | <b>2</b>  |
| <b>Supplementary table 2.</b> Subnational data and population summary statistics, six Anglophone countries                                                                                    | <b>3</b>  |
| <b>Supplementary table 3.</b> Subnational variation in life expectancy at birth and at age 65 for men and women in six Anglophone countries                                                   | <b>4</b>  |
| <b>Supplementary figure 1.</b> Contribution of 18 cause of death categories to differences in life expectancy at birth between 5 Anglophone countries and Australia by age group, women, 2018 | <b>5</b>  |
| <b>Supplementary figure 2.</b> Contribution of 18 cause of death categories to differences in life expectancy at birth between 5 Anglophone countries and Australia by age group, men, 2018   | <b>6</b>  |
| <b>Supplementary figure 3.</b> Life expectancy at age 65 by subnational region, women, 2018 (varying years for Canada)                                                                        | <b>7</b>  |
| <b>Supplementary figure 4.</b> Life expectancy at age 65 by subnational region, men, 2018 (varying years for Canada)                                                                          | <b>8</b>  |
| <b>Supplementary figure 5.</b> Life expectancy at birth by subnational region, women, 2018 (2014-2016 for all Canadian provinces/territories)                                                 | <b>9</b>  |
| <b>Supplementary figure 6.</b> Life expectancy at birth by subnational region, men, 2018 (2014-2016 for all Canadian provinces/territories)                                                   | <b>10</b> |
| <b>Supplementary figure 7.</b> Life expectancy at age 65 by subnational region, women, 2018 (2014-2016 for all Canadian provinces/territories)                                                | <b>11</b> |
| <b>Supplementary figure 8.</b> Life expectancy at age 65 by subnational region, men, 2018 (2014-2016 for all Canadian provinces/territories)                                                  | <b>12</b> |

**Supplementary table 1 | Cause of death categories and ICD-10 codes**

| Category                                         | Included ICD-10 codes                                                                                                                  |
|--------------------------------------------------|----------------------------------------------------------------------------------------------------------------------------------------|
| 1. Perinatal conditions and congenital anomalies | P00-P99, Q00-Q99                                                                                                                       |
| 2. Infectious diseases                           | A00-B99                                                                                                                                |
| 3. Motor vehicle accidents                       | V02-V04, V09.0, V09.0, V09.2, V12-V14, V19.0-V19.2, V19.4-V19.6, V20-V79, V80.3-V80.5, V81.0-V81.1, V82.0-V82.1, V83-V88, V89.0, V89.2 |
| 4. Firearm related deaths                        | W32-W34, X72-X74, X93-X95, Y22-Y24, Y35.0                                                                                              |
| 5. Other external causes                         | V01-Y89, excluding relevant codes in categories 3, 4, 6, and 7                                                                         |
| 6. Drug related deaths <sup>a</sup>              | X40-44, X60-X64, X85, Y10-Y14                                                                                                          |
| 7. Alcohol related deaths <sup>a</sup>           | E24.4, F10, G31.2, G62.1, G72.1, I42.6, K29.2, K70, K85.2, K86.0, R78.0, X45, X65, Y15                                                 |
| 8. Endocrine and metabolic diseases              | E00-E99, excluding E24.4                                                                                                               |
| 9. Ischemic heart disease                        | I20-I25                                                                                                                                |
| 10. All other circulatory diseases               | I00-I00, excluding I42.6, I20-I25                                                                                                      |
| 11. Influenza and pneumonia <sup>b</sup>         | J09-J18                                                                                                                                |
| 12. All other respiratory diseases <sup>b</sup>  | J00-J98, excluding J09-J18                                                                                                             |
| 13. Lung cancer <sup>c</sup>                     | C33-C34                                                                                                                                |
| 14. Screenable cancers <sup>c</sup>              | C18-C21, C50, C53, C61                                                                                                                 |
| 15. All other cancers <sup>c</sup>               | C00-D48, excluding C18-C21, C33-C34, C50, C53, C61                                                                                     |
| 16. Mental disorders and nervous system diseases | F00-F99, G00-G99, excluding relevant codes in categories 7 and 17                                                                      |
| 17. Alzheimer's disease and related dementias    | F01, F03, G30, G31, excluding G31.2                                                                                                    |
| 18. Residual (all other causes of death)         | D50-D89, H00-H95, K00-K99, L00-L93, M00-M99, N00-N99, O00-099, R00-R99, excluding K29.2, K70, K85.2, K86.0, R78.0                      |

**Notes:** The cause of death categories are mutually exclusive and exhaustive.

<sup>a</sup> Combined into a single category in main text Figures 2 and 3

<sup>b</sup> Combined into a single category in main text Figures 2 and 3

<sup>c</sup> Combined into a single category in main text Figures 2 and 3

Supplementary table 2 | Subnational data and population summary statistics, six Anglophone countries

| Country        | Region             | Year  | No. units | Mean population | Median population | Min population | Max population | Total population |
|----------------|--------------------|-------|-----------|-----------------|-------------------|----------------|----------------|------------------|
| Australia      | State/territory    | 2018  | 8         | 3,123,488       | 2,166,150         | 247,300        | 7,987,300      | 24,987,900       |
| Canada         | Province/territory | 2018* | 13        | 2,851,009       | 958,406           | 38,143         | 14,308,697     | 37,063,114       |
| Ireland        | Region             | 2016  | 8         | 595,233         | 463,189           | 292,301        | 1,347,359      | 4,761,865        |
| New Zealand    | Regional council   | 2018  | 16        | 251,708         | 148,127           | 31,326         | 1,304,958      | 4,027,329        |
| United Kingdom | Region/country**   | 2018  | 12        | 5,536,296       | 5,539,675         | 1,881,641      | 9,133,625      | 66,435,550       |
| United States  | State              | 2018  | 51        | 6,415,048       | 4,468,402         | 577,737        | 39,557,045     | 327,167,434      |
| Total          |                    |       | 95        | 4,340,230       | 2,595,900         | 31,326         | 39,557,045     | 46,524,501       |

\*Data for Canadian provinces/territories in main text Figure 3 come from 2018 except for Yukon territory, which comes from 2016.

\*\*Includes 9 regions within England, plus the three countries of Scotland, Wales, and Northern Ireland.

**Supplementary table 3.** Subnational variation in life expectancy at birth and at age 65 (years) for men and women in six Anglophone countries

| Country        | Women |      |        |       |       |       | Men   |      |        |       |       |       |
|----------------|-------|------|--------|-------|-------|-------|-------|------|--------|-------|-------|-------|
|                | Mean  | SD   | Median | Min   | Max   | Range | Mean  | SD   | Median | Min   | Max   | Range |
| <b>Birth</b>   |       |      |        |       |       |       |       |      |        |       |       |       |
| Australia      | 84.38 | 1.66 | 84.88  | 80.60 | 85.55 | 4.96  | 80.09 | 1.97 | 80.57  | 75.55 | 81.75 | 6.20  |
| Canada         | 81.92 | 3.24 | 82.47  | 72.60 | 84.79 | 12.19 | 77.75 | 2.97 | 78.24  | 69.35 | 80.71 | 11.36 |
| Ireland        | 83.43 | 0.60 | 83.30  | 82.50 | 84.50 | 2.00  | 79.64 | 0.47 | 79.60  | 79.00 | 80.30 | 1.30  |
| New Zealand    | 83.09 | 1.06 | 83.12  | 80.57 | 84.50 | 3.93  | 79.49 | 1.17 | 79.41  | 76.79 | 81.21 | 4.42  |
| United Kingdom | 82.93 | 1.09 | 82.71  | 81.14 | 84.69 | 3.55  | 79.23 | 1.20 | 78.89  | 77.16 | 80.92 | 3.76  |
| United States  | 80.72 | 1.57 | 81.10  | 77.30 | 84.00 | 6.70  | 75.70 | 1.84 | 76.00  | 71.70 | 78.40 | 6.70  |
| <b>Age 65</b>  |       |      |        |       |       |       |       |      |        |       |       |       |
| Australia      | 22.35 | 0.77 | 22.58  | 20.78 | 23.10 | 2.31  | 19.60 | 0.99 | 19.87  | 17.32 | 20.37 | 3.05  |
| Canada         | 20.71 | 2.41 | 21.57  | 14.00 | 22.77 | 8.77  | 18.47 | 1.10 | 18.56  | 16.20 | 20.02 | 3.82  |
| Ireland        | 20.94 | 0.44 | 20.90  | 20.30 | 21.70 | 1.40  | 18.34 | 0.31 | 18.35  | 17.80 | 18.70 | 0.90  |
| New Zealand    | 21.36 | 0.72 | 21.47  | 19.62 | 22.37 | 2.75  | 19.16 | 0.69 | 19.27  | 17.48 | 20.30 | 2.82  |
| United Kingdom | 21.04 | 0.76 | 20.91  | 19.85 | 22.31 | 2.46  | 18.73 | 0.64 | 18.59  | 17.69 | 19.71 | 2.02  |
| United States  | 20.33 | 0.84 | 20.50  | 18.60 | 22.60 | 4.00  | 17.79 | 0.83 | 18.00  | 15.90 | 19.30 | 3.40  |

Notes: SD=standard deviation. Data are for 2018 except for Yukon territory (2014-2016), Nunavut territory (2016-2018), Northwest Territories (2016-2018), and Prince Edward Island province (2016-2018) in Canada and Ireland (2016).

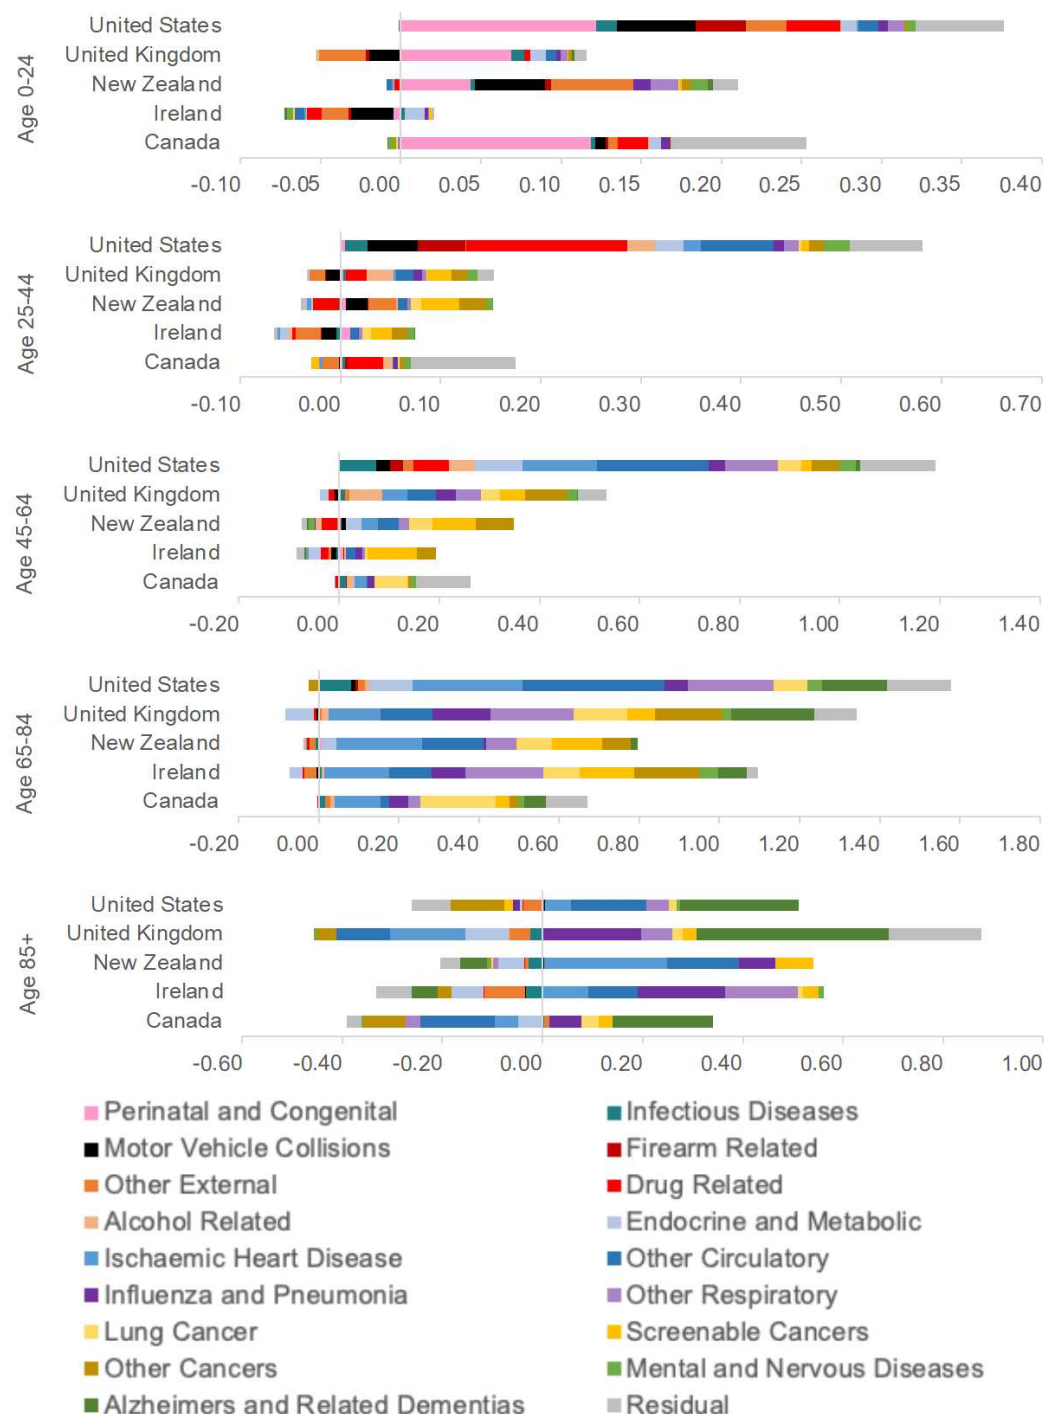

**Supplementary figure 1 | Contribution of 18 cause of death categories to differences in life expectancy at birth between 5 Anglophone countries and Australia by age group, women, 2018**

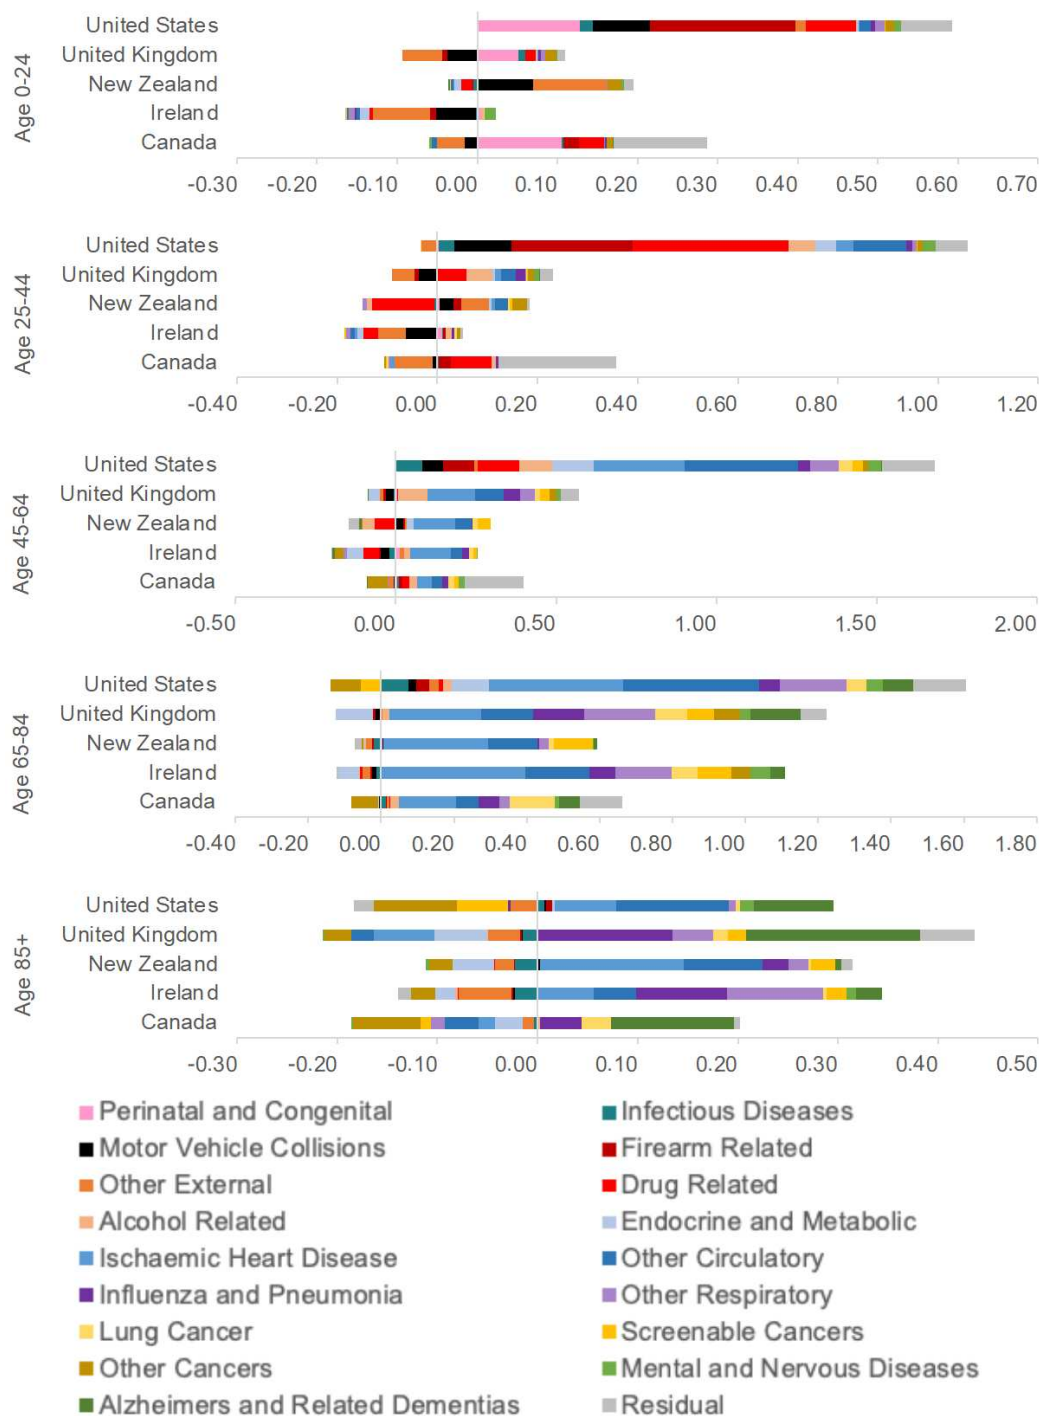

**Supplementary figure 2 | Contribution of 18 cause of death categories to differences in life expectancy at birth between 5 Anglophone countries and Australia by age group, men, 2018**

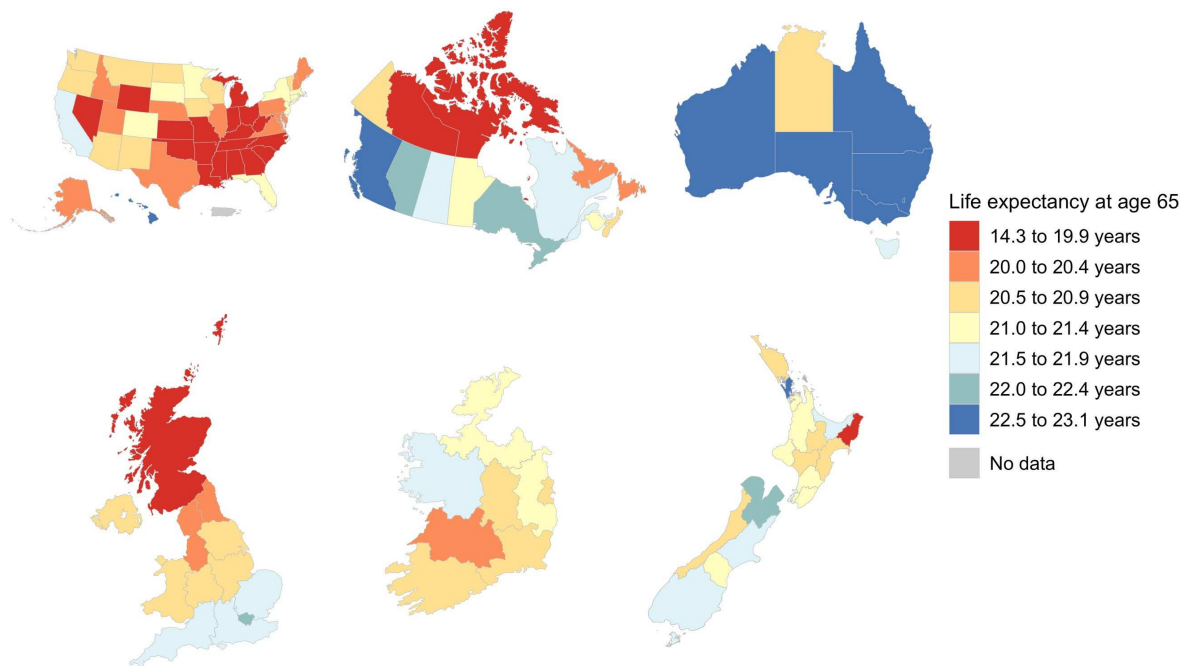

**Supplementary figure 3 | Life expectancy at age 65 by subnational region, women, 2018 (varying years for Canada)**

*Note: Data are for 2018 except for Yukon territory (2014-2016), Nunavut territory (2016-2018), Northwest Territories (2016-2018), and Prince Edward Island province (2016-2018) in Canada and Ireland (2016).*

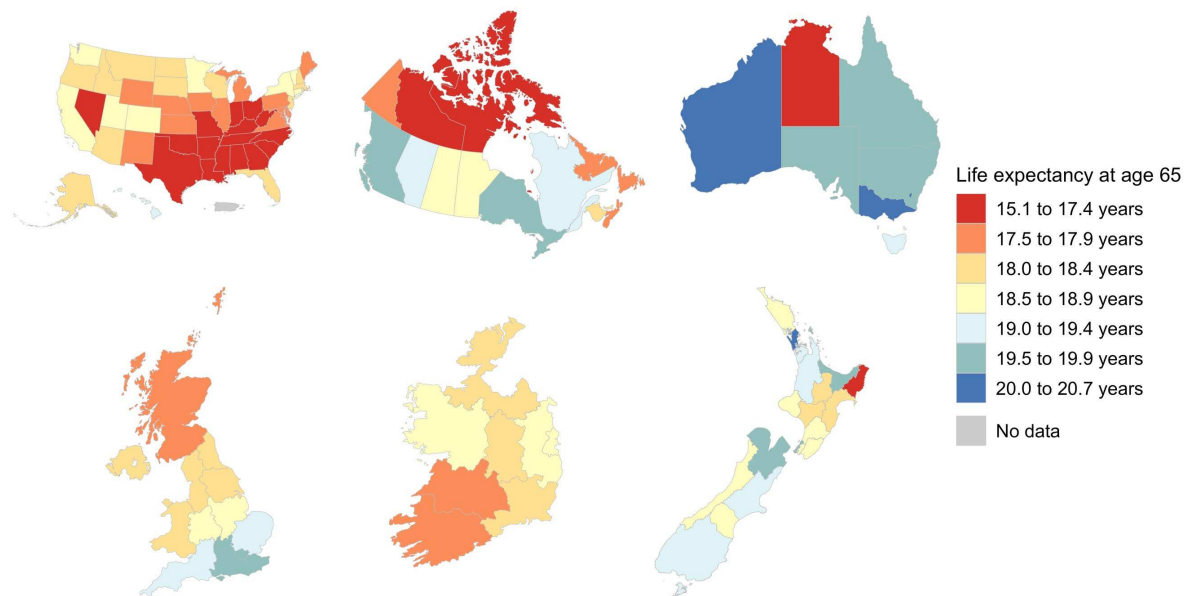

**Supplementary figure 4 | Life expectancy at age 65 by subnational region, men, 2018 (varying years for Canada)**

*Note: Data are for 2018 except for Yukon territory (2014-2016), Nunavut territory (2016-2018), Northwest Territories (2016-2018), and Prince Edward Island province (2016-2018) in Canada and Ireland (2016).*



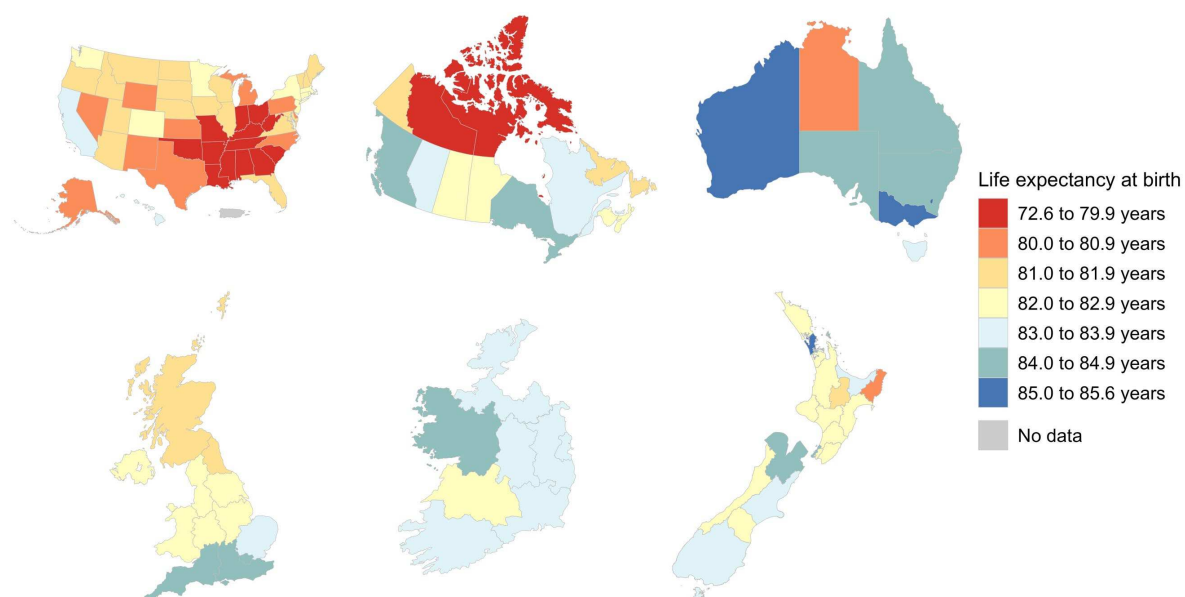

**Supplementary figure 5 | Life expectancy at birth by subnational region, women, 2018 (2014-2016 for all Canadian provinces/territories)**

*Note: Data are for 2018 except for all provinces/territories of Canada (2014-2016) and Ireland (2016).*

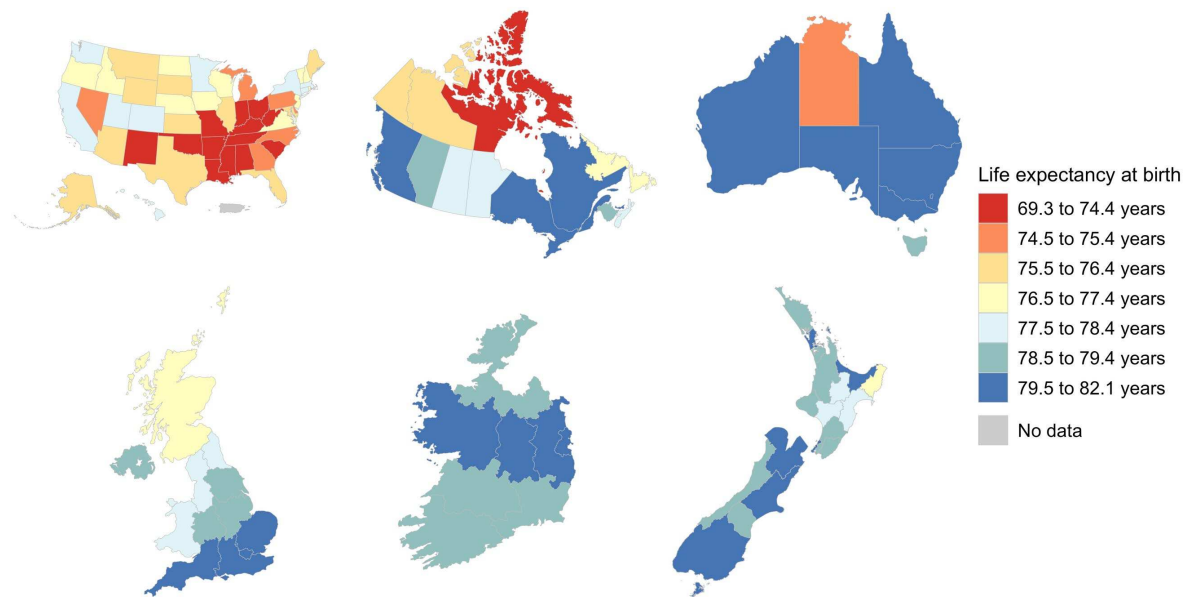

**Supplementary figure 6 | Life expectancy at birth by subnational region, men, 2018 (2014-2016 for all Canadian provinces/territories)**

*Note: Data are for 2018 except for all provinces/territories of Canada (2014-2016) and Ireland (2016).*

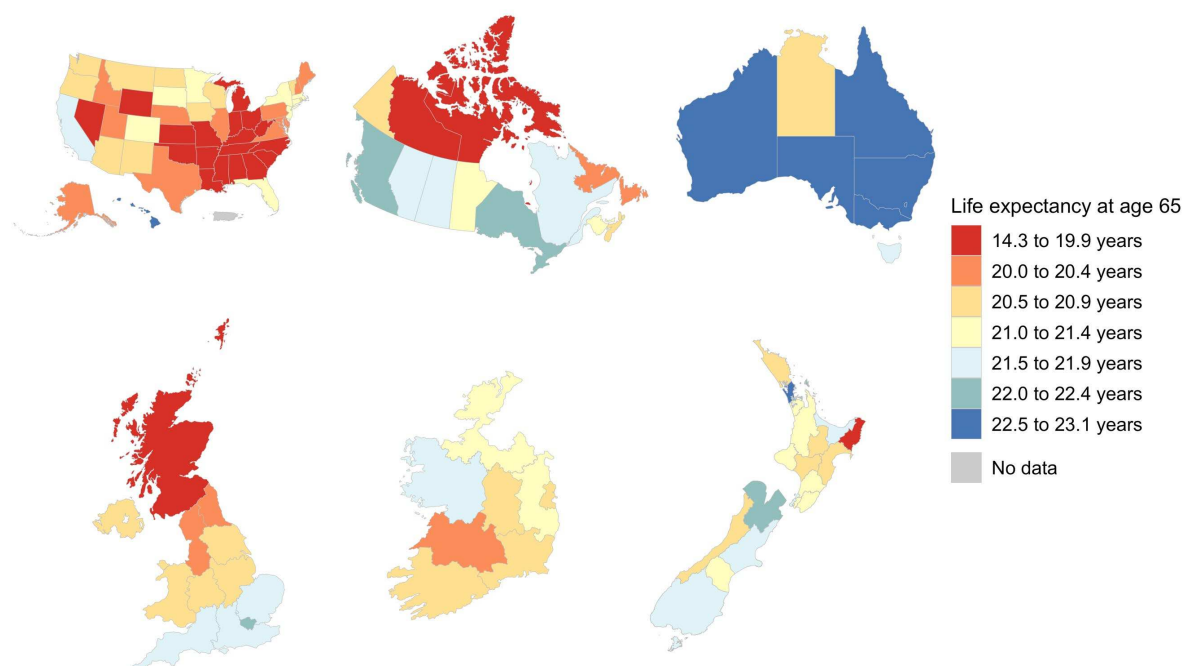

**Supplementary figure 7 | Life expectancy at age 65 by subnational region, women, 2018 (2014-2016 for all Canadian provinces/territories)**

*Note: Data are for 2018 except for all provinces/territories of Canada (2014-2016) and Ireland (2016).*

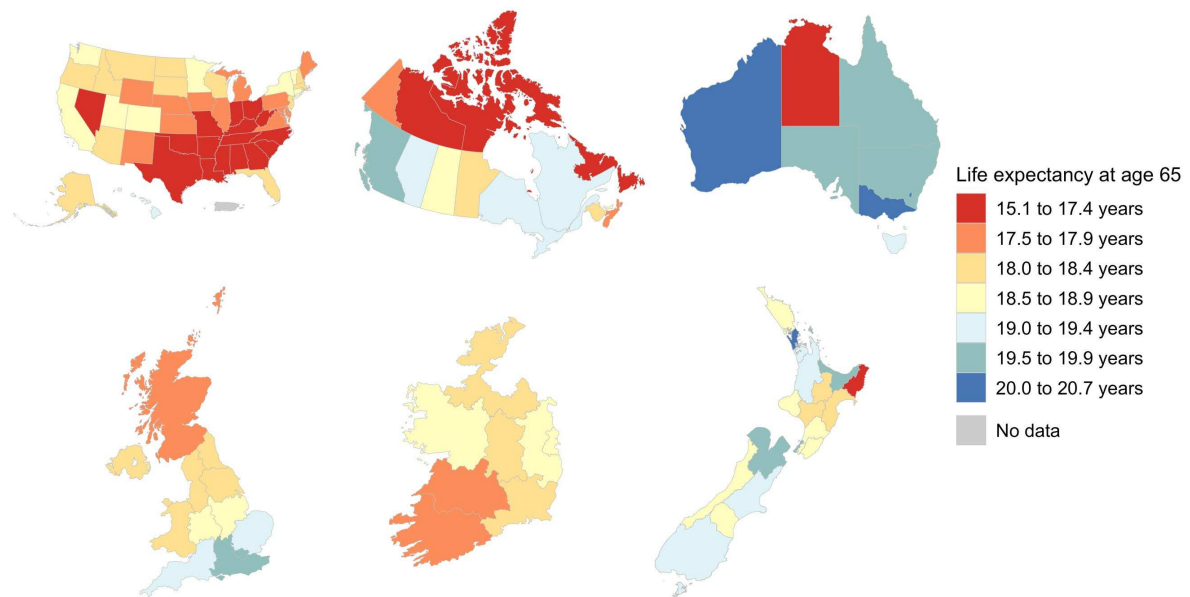

**Supplementary figure 8 | Life expectancy at age 65 by subnational region, men, 2018 (2014-2016 for all Canadian provinces/territories)**

*Note: Data are for 2018 except for all provinces/territories of Canada (2014-2016) and Ireland (2016).*
